# Supplementary material for: Zein/gelatin/nanohydroxyapatite nanofibrous scaffolds are biocompatible and promote osteogenic differentiation of human periodontal ligament stem cells
Source: Royal Society of Chemistry journal article supplement (doi:10.1039/c8bm01653d), 2019-01-01
Supplement: c8bm01653d1.pdf [file c8bm01653d1.pdf]

## Supplementary information

### **Zein/gelatin/nanohydroxyapatite nanofibrous scaffolds are biocompatible and promote osteogenic differentiation of human periodontal ligament stem cells**

Qianmin Ou<sup>a,#</sup>, Yingling Miao<sup>b,#</sup>, Fanqiao Yang<sup>c</sup>, Xuefeng Lin<sup>a</sup>, Li-Ming Zhang<sup>b,\*</sup> and Yan Wang<sup>a,\*</sup>

<sup>a</sup>Guanghua School of Stomatology, Sun Yat-sen University, Guangdong Provincial Key Laboratory of Stomatology, Guangzhou 510080, China.

<sup>b</sup>School of Materials Science and Engineering, Sun Yat-sen University, Guangzhou 510275, China.

<sup>c</sup>Shunde hospital of Southern Medical University, Southern Medical University, Shunde, 528300, China.

# The first two authors contributed equally to this study.

\* Corresponding author: Li-Ming Zhang and Yan Wang.

\* E-mail: ceszhlm@mail.sysu.edu.cn (Li-Ming Zhang), Phone: +86 2084112354

\* E-mail: wang93@mail.sysu.edu.cn (Yan Wang), Phone: +86 2087330592

## **Supplementary methods:**

### **1. Mechanical analyses**

The different electrospun scaffolds were cut into  $10 \times 30 \text{ mm}^2$  in size. Tensile was examined using an electronic universal testing machine (CMT6103, Sans, Shenzhen, China). The measurement was completed with a stretching speed of 2 mm/min at 25 °C and relative humidity 46%. Three specimens of each sample were measured.

### **2. In vitro degradation**

The in vitro degradation behaviors of the different scaffolds were studied in PBS supplemented with collagenase type I (10 mg/mL). The nanofibrous scaffolds were cut into  $10 \times 10 \text{ mm}^2$  and dried under vacuum. After weighing, they were immersed in buffer solution. The solution was replaced daily. At the observed time, the samples were withdrawn, rinsed and dried.<sup>1,2</sup> The weight loss of each samples were calculated (1).

$$\text{Weight loss (\%)} = \frac{W_0 - W_t}{W_0} \times 100\% \quad (1)$$

$W_0$  was the initial weight of the scaffold and  $W_t$  was the weight of the scaffold after degradation at the observed time.

## Supplementary Results:

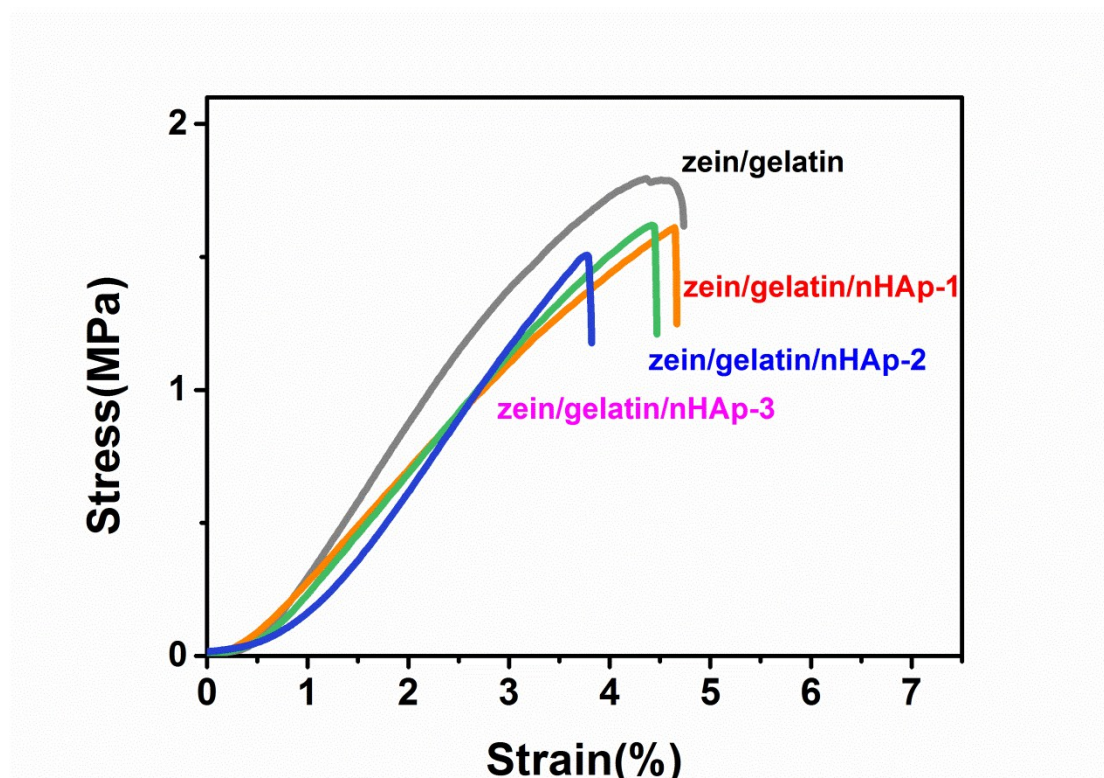

**Figure.S1.** Typical stress–strain curves of zein/gelatin, zein/gelatin/nHAp-1, zein/gelatin/nHAp-2, zein/gelatin/nHAp-3 electrospun membranes.

**Table S1.** Mechanical properties of electrospun zein/gelatin nanofibers with different compositions.

|                     | Stress/%  | Strain/MPa |
|---------------------|-----------|------------|
| zein/gelatin        | 4.6±0.09  | 1.79±0.16  |
| zein/gelatin/nHAp-1 | 4.65±0.12 | 1.60±0.10  |
| zein/gelatin/nHAp-2 | 4.43±0.11 | 1.62±0.11  |
| zein/gelatin/nHAp-3 | 3.78±0.13 | 1.51±0.08  |

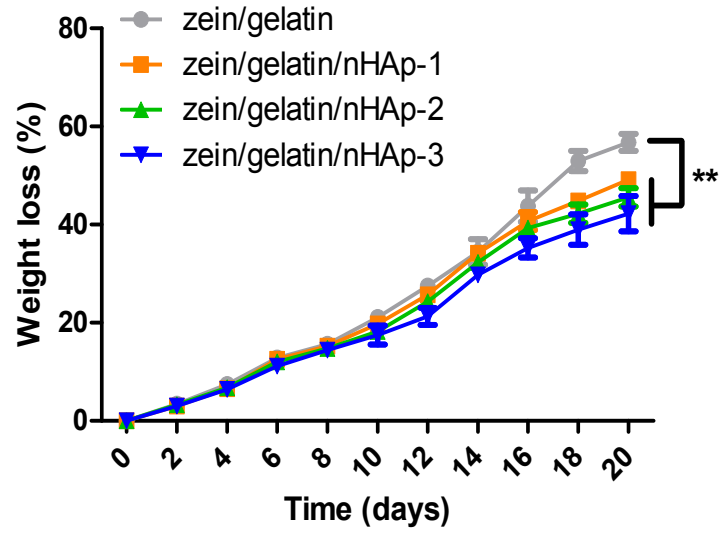

**Figure. S2.**

Degradation behaviors of zein/gelatin, zein/gelatin/nHAp-1, zein/gelatin/nHAp-2, zein/gelatin/nHAp-3 electrospun membranes in collagenase type I solution (\*\* $p < 0.01$ ).

## References:

- 1 J. Li, W. Xu, D. Li, T. Liu, Y. S. Zhang, J. Ding and X. Chen, *ACS Nano*, 2018, **12**, 6685-6699.
- 2 J. Wei, P. Guo-Wang, Q. Han, J. Ding and X. Chen, *J Control Release*, 2015, **213**, e62-3.
